# Supplementary material for: Removal of methylene blue and lead(ii) via PVA/SA double-cross-linked network gel beads loaded with Fe3O4@KHA nanoparticles
Source: Royal Society of Chemistry journal article supplement (doi:10.1039/d1nj00006c), 2021-01-01
Supplement: d1nj00006c1.pdf [file d1nj00006c1.pdf]

Electronic Supplementary Material (ESI) for New Journal of Chemistry

**Supplementary Material for**

**Removal of methylene blue and Lead (II) via PVA/SA double cross-linked network gel beads loaded Fe<sub>3</sub>O<sub>4</sub>@KHA nanoparticles**

Yuhua Niu <sup>†, ‡, §\*</sup>, Xingxing Han <sup>†</sup>, Jie Song <sup>†, ‡</sup>, Liangxian Huang <sup>†, ‡</sup>

<sup>†</sup> *College of Chemistry and Chemical Engineering, Shaanxi University of Science and Technology, Xi'an 710021, People's Republic of China*

<sup>‡</sup> *Shaanxi Key Laboratory of Chemical Additives for Industry, Shaanxi University of Science and Technology, Xi'an 710021, People's Republic of China*

<sup>§</sup> *Key Laboratory of Chemical Additives for China National Light Industry, Shaanxi University of Science and Technology, Xi'an, 710021, People's Republic of China*

\* Corresponding authors:

E-mail address: [hanxingxing3922@163.com](mailto:hanxingxing3922@163.com). (*Yuhua Niu*)

Tel.: +86-29-86168830; Fax: +86-29-86168830.

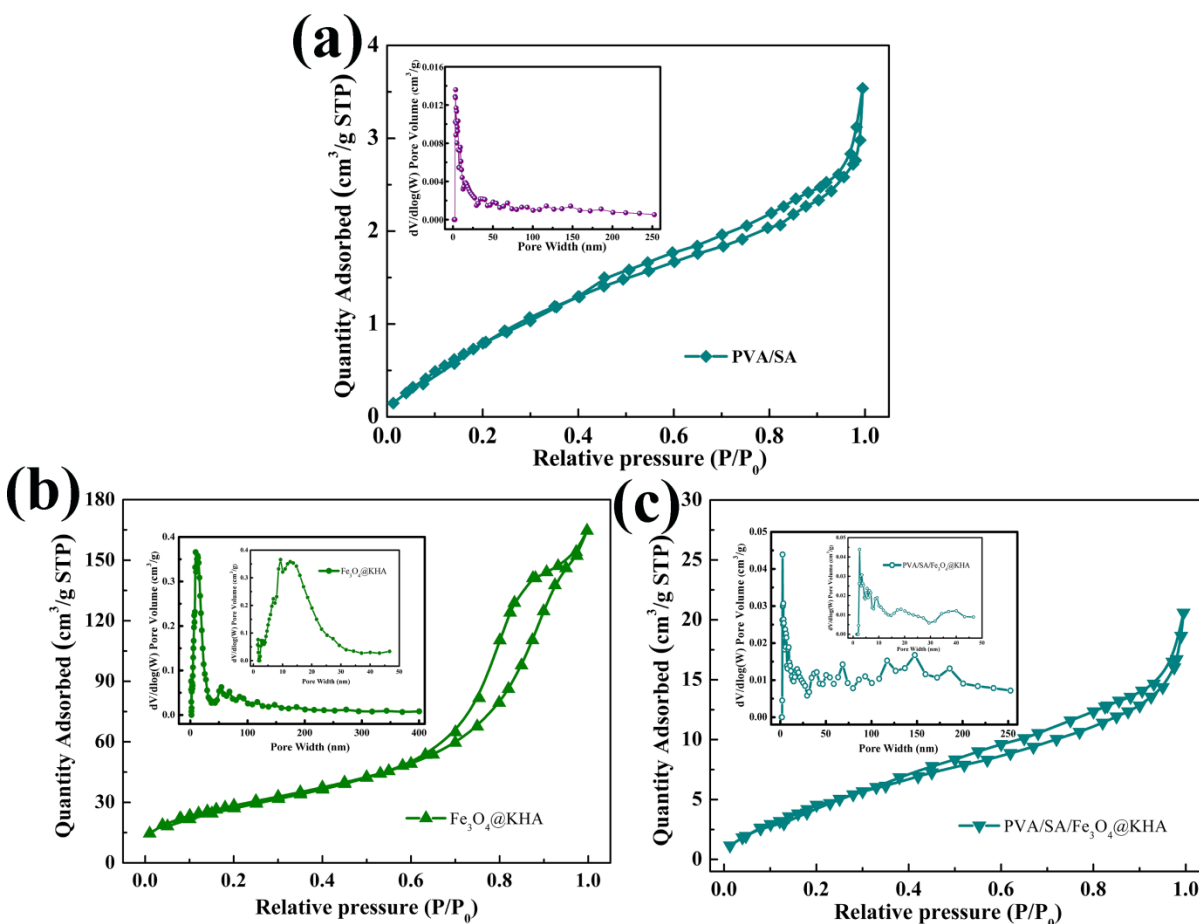

**Figure S 1.** Nitrogen adsorption-desorption isotherm and pore size distribution of PVA/SA (a), Fe<sub>3</sub>O<sub>4</sub>@KHA (b) and PVA/SA/Fe<sub>3</sub>O<sub>4</sub>@KHA (c).

**Table S1** The specific surface area, average pore diameter, and pore volume of PVA/SA, Fe<sub>3</sub>O<sub>4</sub>@KHA and PVA/SA/Fe<sub>3</sub>O<sub>4</sub>@KHA

|                                            | specific surface area<br>(m <sup>2</sup> /g) | average pore diameter<br>(nm) | pore volume<br>(cm <sup>3</sup> /g) |
|--------------------------------------------|----------------------------------------------|-------------------------------|-------------------------------------|
| PVA/SA                                     | 11.27                                        | 4.15                          | 0.0115                              |
| Fe <sub>3</sub> O <sub>4</sub> @KHA        | 105.19                                       | 9.01                          | 0.2513                              |
| PVA/SA/Fe <sub>3</sub> O <sub>4</sub> @KHA | 20.93                                        | 5.50                          | 0.0307                              |
